# Supplementary material for: Bauhinia purprea agglutinin‐modified liposomes for human prostate cancer treatment
Source: PubMed Central journal article supplement — Cancer Sci. 2015 Dec 11;107(1):53–9. doi: 10.1111/cas.12839 (PMC4724813; doi:10.1111/cas.12839), 2015-12-11
Supplement: CAS-107-53-s001.pdf [file CAS-107-53-s001.pdf]

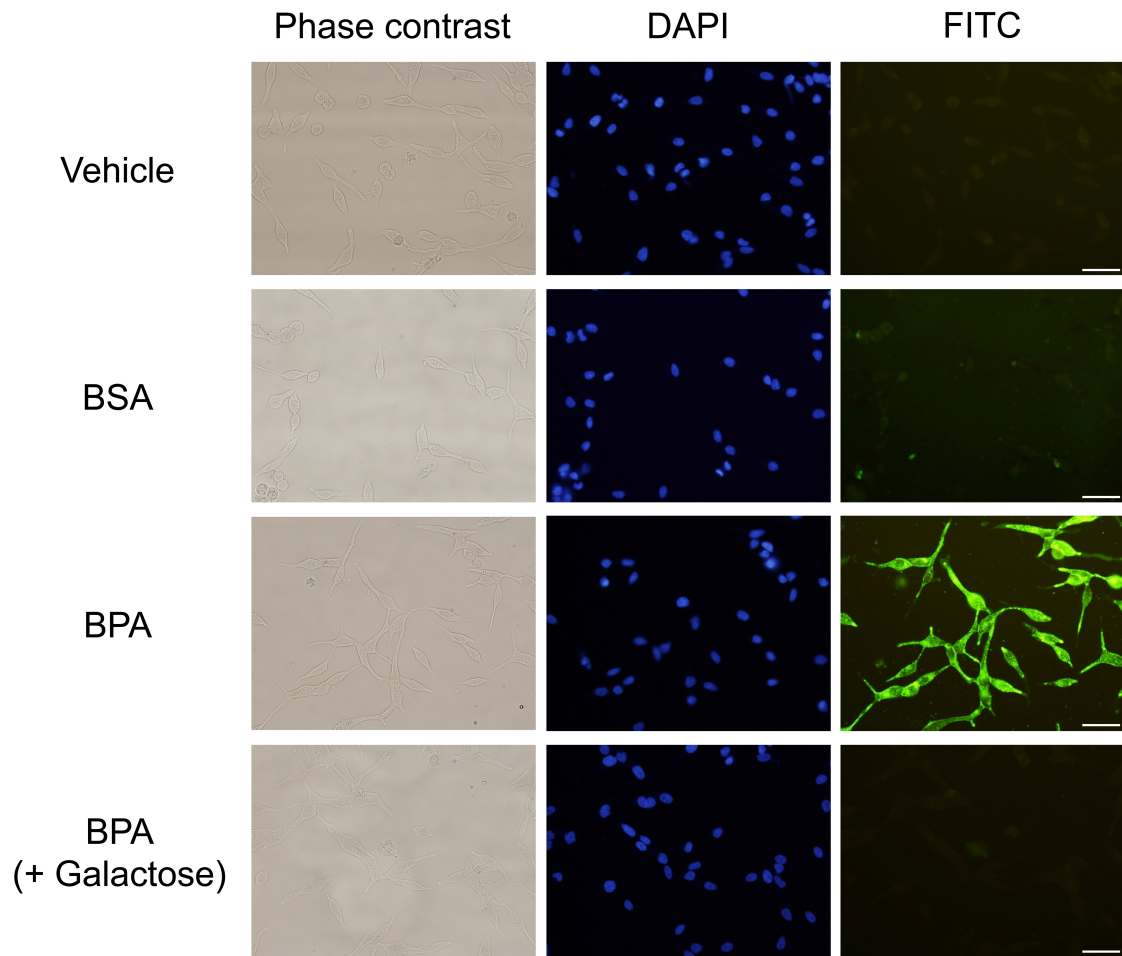

Fig. S1. Binding of BPA to human prostate LNCaP cancer cells

BPA-FITC or BSA-FITC was added to LNCaP cells in the absence or presence of 200 mM galactose on a slide glass, and the cells were then incubated at 37°C for 1 h. The fluorescence was observed under a fluorescence microscope. The green image shows the distribution of the lectin; and blue images show the nuclei stained by DAPI. Scale bars: 100  $\mu$ m.
