# Supplementary material for: Bauhinia purprea agglutinin‐modified liposomes for human prostate cancer treatment
Source: PubMed Central journal article supplement — Cancer Sci. 2015 Dec 11;107(1):53–9. doi: 10.1111/cas.12839 (PMC4724813; doi:10.1111/cas.12839), 2015-12-11
Supplement: CAS-107-53-s002.pdf [file CAS-107-53-s002.pdf]

| Organs   | Diseases                    | Binding |
|----------|-----------------------------|---------|
| Bladder  | Transitional cell carcinoma | ++      |
|          | Normal                      | -       |
| Breast   | Invasive duct carcinoma     | +++     |
|          | Normal                      | -       |
| Colon    | Adenocarcinoma              | ++      |
|          | Normal                      | -       |
| Liver    | Hepatocellular carcinoma    | -       |
|          | Normal                      | -       |
| Lung     | Adenocarcinoma              | ++++    |
|          | Normal                      | -       |
| Pancreas | Adenocarcinoma              | +       |
|          | Normal                      | -       |
| Prostate | Adenocarcinoma              | ++++    |
|          | Normal                      | -       |
| Testis   | Seminoma                    | -       |
|          | Normal                      | -       |
| Thyroid  | Papillary carcinoma         | -       |
|          | Normal                      | -       |

Table S1. Binding potential of BPA to human cancer tissues.

Binding potentials of BPA to cancer and normal tissues in each organ were summarized and shown in stages from weak (+) to strong (++++).
